# Supplementary material for: Targeting lysyl oxidase (LOX) overcomes chemotherapy resistance in triple negative breast cancer
Source: PubMed Central journal article supplement (PMC7229173; doi:10.1038/s41467-020-16199-4), 2020-05-15
Supplement: 41467_2020_16199_MOESM3_ESM.pdf [file 41467_2020_16199_MOESM3_ESM.pdf]

## Description of Additional Supplementary Files

File Name: Supplementary Data 1

Description: List of genes in doxorubicin resistance gene signature. Top deregulated genes between doxorubicin sensitive vs. resistant xenografts developed *in vivo* (n = 441)
